# Supplementary material
Source: PubMed Central journal article supplement (PMC2878045)

## SUPPLEMENTARY FIGURES AND TABLES

**Supplementary Fig. 1.** Representative mass spectra of PM4-S (A) and PM5-S (B) obtained in MS2-scan mode and MRM mode by HPLC-MS/MS using electrospray negative ionization. Precursor ion (397.3 m/z) was filtered in MRM mode to generate the total ion chromatogram (TIC). (C) Representative results of TIC from analysis of one oocyte from each experimental group. Taurosulpholithocholic acid (0.5  $\mu$ M) was added to the lysis/extraction solution as an internal standard (I.S.). The inset shows the chemical structure of PM4-S and PM5-S.

**Supplementary Fig. 2.** PM5-S dose response in PHH expressed as proportion of untreated controls. Values represent mean  $\pm$  SEM of 3 independent experiments. \*P<0.05 for PM5-S treatment groups versus untreated controls.

**Supplementary Table 1.**

| Gene                     | Forward primer (5'-3')   | Reverse primer (5'-3') |
|--------------------------|--------------------------|------------------------|
| <i>L19</i>               | CCAAC TCCCGTCAGCAGATC    | CAAGGTGTTTTCCGGCATC    |
| <i>NTCP (SLC10A1)</i>    | TTTGCCATGACACCACTCTGA    | TGCACCGTCCATTGAGGC     |
| <i>OATP1B1 (SLCO1B1)</i> | ACAGCAGAGGCACAACCTTCA    | TGCCAAGAACATCTTCAATCCA |
| <i>OATP1B3 (SLCO1B3)</i> | ACAGCAGAGTCAGCATCTTCAGAG | GGCTGCCAAGAACATCTTGAAT |

Primer sequences used in this study

**Supplementary Table 2.**

| Sample         | <i>NTCP</i> Ct    | <i>L19</i> Ct | Normalised (Ct gene of interest - Ct housekeeping control) |
|----------------|-------------------|---------------|------------------------------------------------------------|
| SFHL NTCP1     | 20.26             | 19.42         | 0.84                                                       |
| SFHL NTCP2     | 21.00             | 20.34         | 0.66                                                       |
| SFHL NTCP3     | 20.00             | 19.39         | 0.61                                                       |
| SFHL NTCP4     | 27.30             | 22.27         | 5.03                                                       |
| SFHL NTCP5     | 27.74             | 26.12         | 1.62                                                       |
| SFHL NTCP6     | 19.53             | 18.81         | 0.72                                                       |
| PHH NTCP1      | 24.37             | 19.14         | 5.23                                                       |
| PHH NTCP2      | 24.15             | 20.42         | 3.73                                                       |
| PHH NTCP3      | 25.77             | 20.07         | 5.70                                                       |
| PHH NTCP4      | 24.31             | 19.26         | 5.05                                                       |
| PHH NTCP5      | 20.50             | 17.87         | 2.63                                                       |
| PHH NTCP6      | 23.06             | 19.96         | 3.10                                                       |
| Sample         | <i>OATP1B1</i> Ct | <i>L19</i> Ct | Normalised (Ct gene of interest - Ct housekeeping control) |
| SFHL OATP1B1 1 | 20.39             | 21.92         | -1.53                                                      |
| SFHL OATP1B1 2 | 15.21             | 16.81         | -1.59                                                      |
| SFHL OATP1B1 3 | 15.74             | 17.03         | -1.29                                                      |
| PHH OATP1B1 1  | 25.91             | 19.89         | 6.02                                                       |
| PHH OATP1B1 2  | 24.67             | 19.05         | 5.62                                                       |
| PHH OATP1B1 3  | 23.91             | 18.88         | 5.03                                                       |
| PHH OATP1B1 4  | 24.29             | 19.38         | 4.91                                                       |
| PHH OATP1B1 5  | 18.40             | 14.81         | 3.59                                                       |
| PHH OATP1B1 6  | 18.78             | 16.76         | 2.02                                                       |
| PHH OATP1B1 7  | 17.80             | 14.01         | 3.79                                                       |
| Sample         | <i>OATP1B3</i> Ct | <i>L19</i> Ct | Normalised (Ct gene of interest - Ct housekeeping control) |
| SFHL OATP1B3 1 | 22.14             | 23.52         | -1.39                                                      |
| SFHL OATP1B3 2 | 25.44             | 28.71         | -3.27                                                      |
| SFHL OATP1B3 3 | 31.48             | 25.31         | 6.17                                                       |
| SFHL OATP1B3 4 | 26.81             | 21.92         | 4.89                                                       |
| PHH OATP1B3 1  | 26.02             | 20.50         | 5.52                                                       |
| PHH OATP1B3 2  | 25.41             | 20.97         | 4.45                                                       |
| PHH OATP1B3 3  | 30.86             | 27.62         | 3.24                                                       |
| PHH OATP1B3 4  | 25.89             | 21.44         | 4.45                                                       |
| PHH OATP1B3 5  | 30.54             | 24.67         | 5.87                                                       |

Raw Ct values for SFHL and PHH *L19*, *NTCP*, *OATP1B1* and *OATP1B3*. Basic normalised values are calculated as Ct gene of interest minus the *L19* Ct value. The smaller the normalised the value, the higher the expression level.

Supplementary Figure 1

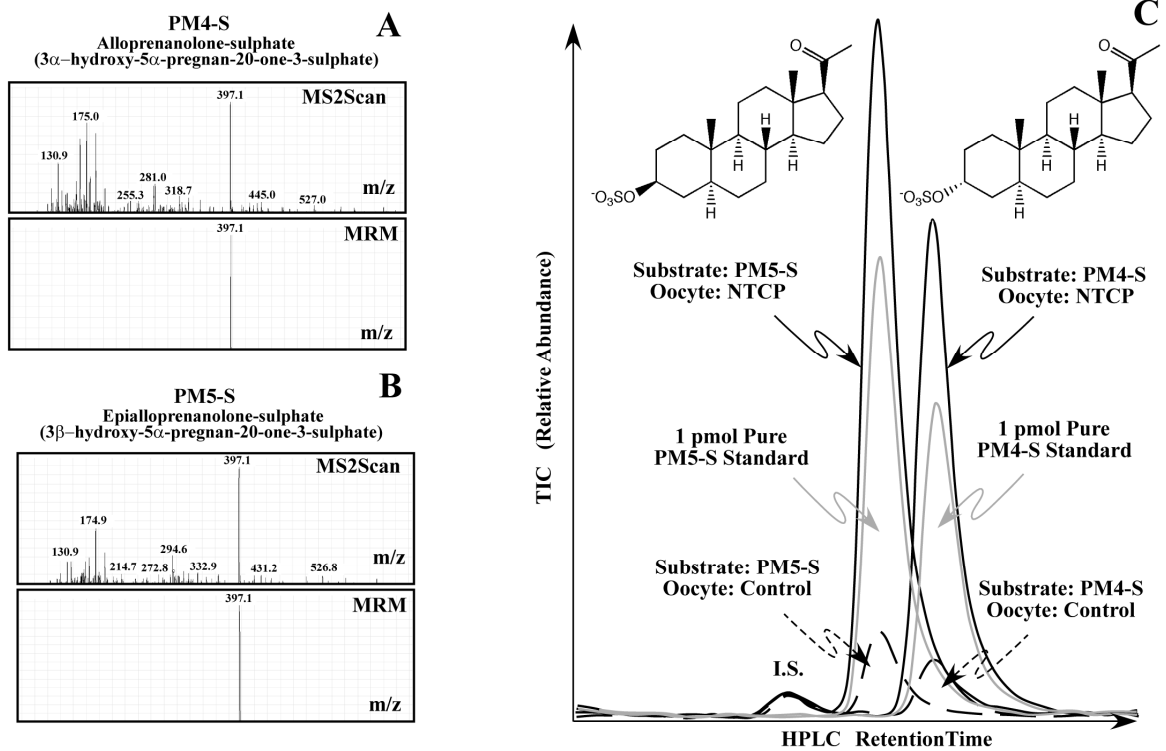

Supplementary figure 2

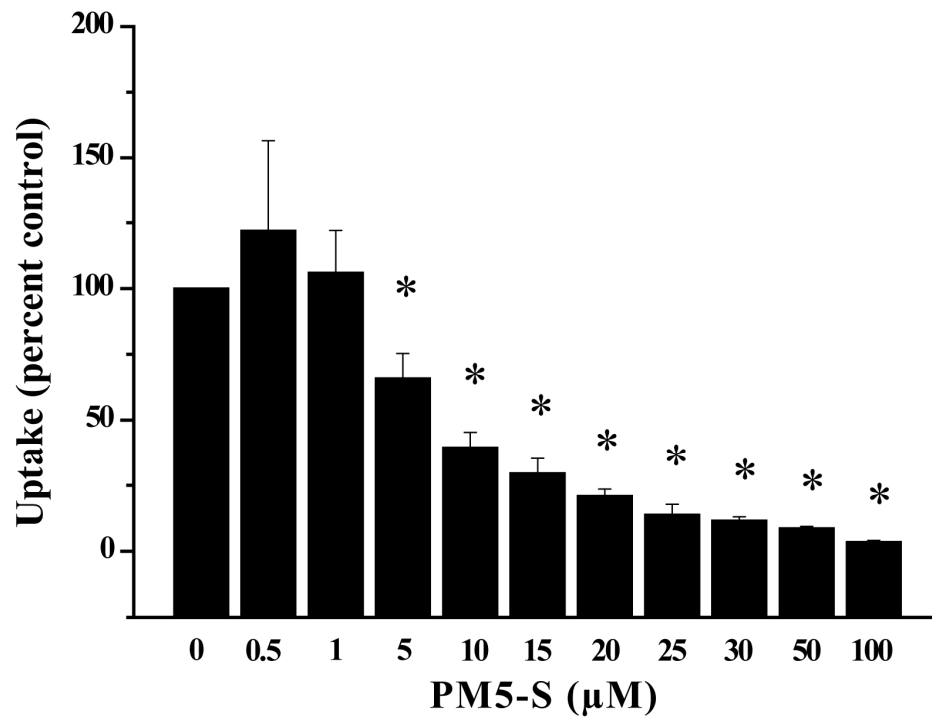

Supplement: supp_M109.072140_jbc.M109.072140-1.pdf [file supp_M109.072140_jbc.M109.072140-1.pdf]
